# Supplementary material for: Inverted process for graphene integrated circuits fabrication
Source: Royal Society of Chemistry journal article supplement (doi:10.1039/c3nr06904d), 2014-01-01
Supplement: c3nr06904d1.pdf [file c3nr06904d1.pdf]

## Electronic Supplementary Information

### Inverted Process for Graphene Integrated Circuits Fabrication on 200mm Wafers

Hongming Lv<sup>a</sup>, Huaqiang Wu<sup>a\*</sup>, Jinbiao Liu<sup>b</sup>, Can Huang<sup>a</sup>, Junfeng Li<sup>b</sup>, Jiahan Yu<sup>b</sup>, Jiebin Niu<sup>b</sup>, Qiuxia Xu<sup>b</sup>, Zhiping Yu<sup>a</sup>, He Qian<sup>a</sup>

<sup>a</sup> Institute of Microelectronics, Tsinghua University, Haidian District, Beijing, 100084, China. Fax: +86-010-62771130; Tel: +86-010-62782712; E-mail: [wuhq@tsinghua.com](mailto:wuhq@tsinghua.com)

<sup>b</sup> Institute of Microelectronics, Chinese Academy of Sciences, Haidian District, Beijing, China 100029, China.

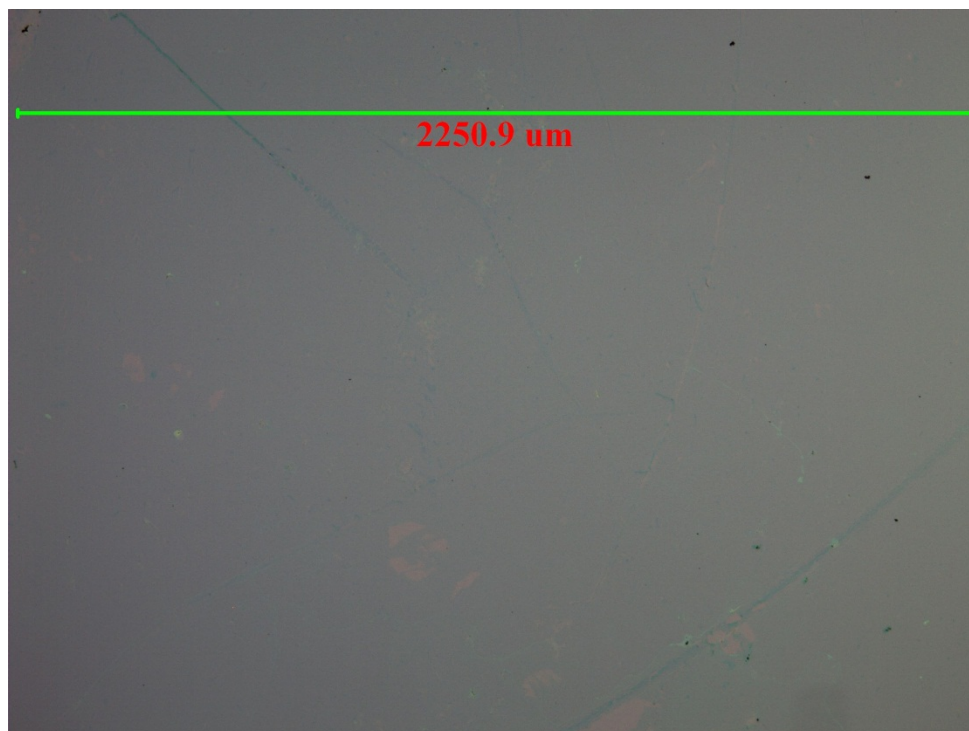

**Figure S1.** Optical image of the graphene film on 300nm SiO<sub>2</sub> substrate. It is synthesized by APCVD method in this work.

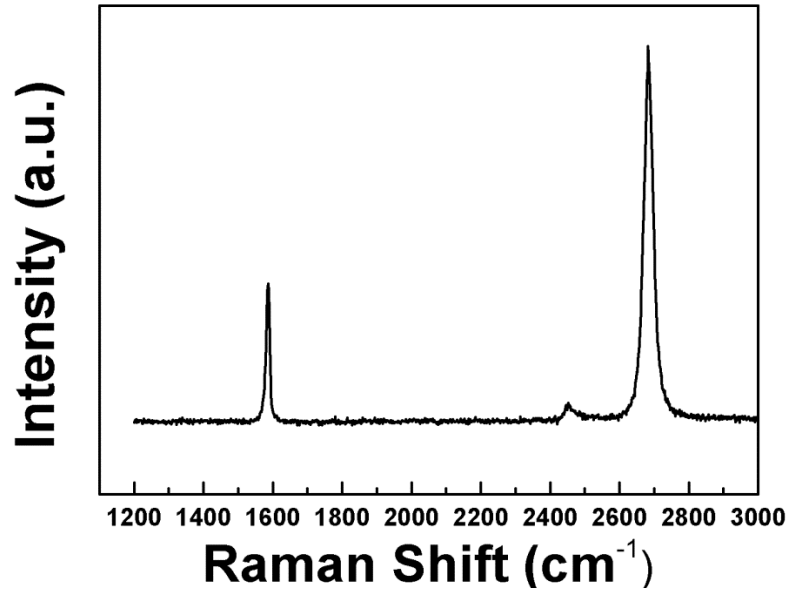

**Figure S2.** Raman spectrum of the graphene film used in this work. The absence of D band indicates good quality of the graphene.

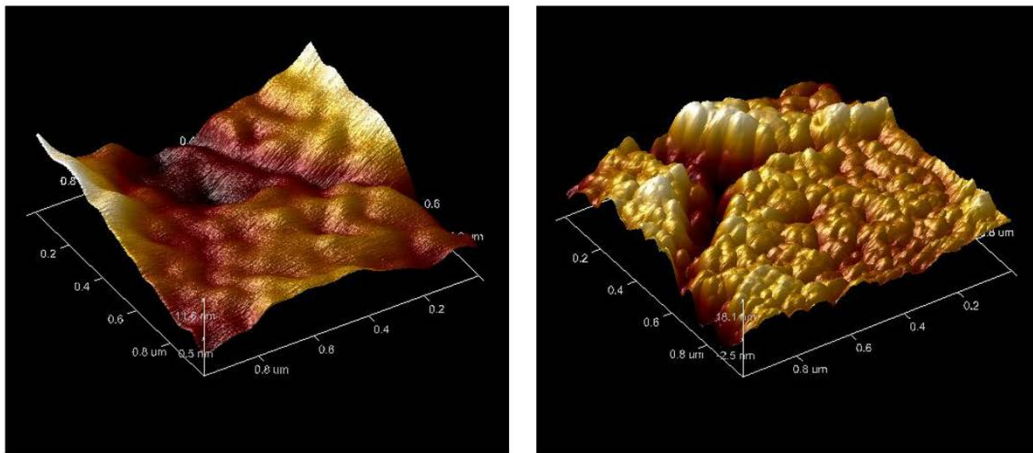

(a)

(b)

**Figure S3.** AFM image of the buried gate stack with (a) and without graphene (b). The graphene film on the buried gate stack is smooth ( $R_q=3.07\text{nm}$ ), while the exposed substrate has a coarser surface ( $R_q=5.22\text{nm}$ ).
